# Supplementary material for: Virus–virus interactions impact the population dynamics of influenza and the common cold
Source: PubMed Central journal article supplement (PMC6936719; doi:10.1073/pnas.1911083116), 2019-12-16
Supplement: pnas.1911083116.sapp.pdf [file pnas.1911083116.sapp.pdf]

## Supporting Information Appendix for

### **Virus-virus interactions impact the population dynamics of influenza and the common cold**

Sema Nickbakhsh, Colette Mair, Louise Matthews, Richard Reeve, Paul C.D. Johnson,  
Fiona Thorburn, Beatrix von Wissmann, Arlene Reynolds, James McMenamin,  
Rory N. Gunson, and Pablo R. Murcia

Correspondence to: [Pablo.Murcia@glasgow.ac.uk](mailto:Pablo.Murcia@glasgow.ac.uk) or [Louise.Matthews@glasgow.ac.uk](mailto:Louise.Matthews@glasgow.ac.uk)

**Table S1: Bivariate Spearman’s cross-correlation coefficients estimated for each pair of virus infection time series data (monthly prevalence). Significance was assessed by asymptotic (*t* approximation) p-values <0.05 (see Table S2). Red indicates significant positive coefficients, blue indicates significant negative coefficients, and gray indicates coefficients not meeting the criteria of significance. Lower (2.5%) and upper (97.5%) quantiles from Spearman’s rank coefficient distributions estimated under the null hypothesis of no virus-virus interactions are given in parentheses. The distribution under the null hypothesis was generated by randomly permuting each pair of virus infection time series data (monthly prevalence) 1000 times.**

|             |                              |                              |                              |                              |                              |                              |                             |                              |                             |                            |           |
|-------------|------------------------------|------------------------------|------------------------------|------------------------------|------------------------------|------------------------------|-----------------------------|------------------------------|-----------------------------|----------------------------|-----------|
| <b>AdV</b>  |                              |                              |                              |                              |                              |                              |                             |                              |                             |                            |           |
| <b>CoV</b>  | 0.065<br>(-0.197,<br>0.219)  |                              |                              |                              |                              |                              |                             |                              |                             |                            |           |
| <b>IAV</b>  | -0.002<br>(-0.214,<br>0.211) | 0.616<br>(-0.201,<br>0.208)  |                              |                              |                              |                              |                             |                              |                             |                            |           |
| <b>IBV</b>  | 0.011<br>(-0.203,<br>0.222)  | 0.496<br>(-0.208,<br>0.216)  | 0.388<br>(-0.223,<br>0.206)  |                              |                              |                              |                             |                              |                             |                            |           |
| <b>MPV</b>  | -0.034<br>(-0.226,<br>0.223) | 0.509<br>(-0.207,<br>0.212)  | 0.311<br>(-0.214,<br>0.204)  | 0.282<br>(-0.219,<br>0.201)  |                              |                              |                             |                              |                             |                            |           |
| <b>PIV1</b> | -0.029<br>(-0.216,<br>0.213) | -0.268<br>(-0.207,<br>0.234) | -0.248<br>(-0.203,<br>0.217) | -0.269<br>(-0.22,<br>0.202)  | -0.230<br>(-0.215,<br>0.211) |                              |                             |                              |                             |                            |           |
| <b>PIV2</b> | -0.20<br>(-0.222,<br>0.211)  | -0.053<br>(-0.221,<br>0.222) | -0.094<br>(-0.206,<br>0.204) | -0.038<br>(-0.204,<br>0.22)  | -0.026<br>(-0.214,<br>0.199) | 0.545<br>(-0.215,<br>0.214)  |                             |                              |                             |                            |           |
| <b>PIV3</b> | 0.329<br>(-0.206,<br>0.207)  | -0.048<br>(-0.217,<br>0.209) | -0.027<br>(-0.209,<br>0.218) | 0.115<br>(-0.211,<br>0.198)  | 0.263<br>(-0.211,<br>0.202)  | -0.204<br>(-0.208,<br>0.212) | -0.360<br>(-0.211,<br>0.22) |                              |                             |                            |           |
| <b>PIV4</b> | -0.229<br>(-0.228,<br>0.22)  | -0.228<br>(-0.222,<br>0.215) | -0.197<br>(-0.217,<br>0.232) | -0.220<br>(-0.216,<br>0.232) | -0.285<br>(-0.22,<br>0.231)  | 0.173<br>(-0.224,<br>0.224)  | 0.148<br>(-0.222,<br>0.226) | -0.213<br>(-0.211,<br>0.230) |                             |                            |           |
| <b>RSV</b>  | -0.193<br>(-0.206,<br>0.203) | 0.607<br>(-0.22,<br>0.196)   | 0.425<br>(-0.209,<br>0.212)  | 0.305<br>(-0.21,<br>0.231)   | 0.385<br>(-0.215,<br>0.207)  | 0.060<br>(-0.204,<br>0.224)  | 0.186<br>(-0.215,<br>0.22)  | -0.308<br>(-0.227,<br>0.201) | 0.008<br>(-0.23,<br>0.226)  |                            |           |
| <b>RV</b>   | -0.386<br>(-0.203,<br>0.205) | -0.456<br>(-0.206,<br>0.20)  | -0.545<br>(-0.224,<br>0.229) | -0.288<br>(-0.227,<br>0.219) | -0.109<br>(-0.199,<br>0.201) | 0.052<br>(-0.20,<br>0.20)    | 0.033<br>(-0.217,<br>0.22)  | 0.037<br>(-0.209,<br>0.204)  | 0.158<br>(-0.221,<br>0.225) | -0.203<br>(-0.2,<br>0.221) |           |
|             | <b>AdV</b>                   | <b>CoV</b>                   | <b>IAV</b>                   | <b>IBV</b>                   | <b>MPV</b>                   | <b>PIV1</b>                  | <b>PIV2</b>                 | <b>PIV3</b>                  | <b>PIV4</b>                 | <b>RSV</b>                 | <b>RV</b> |

**Table S2:** Bivariate cross-correlation asymptotic (t approximation) p-values estimated by Spearman’s rank method between each pair of virus infection time series data (monthly prevalence). Significance was based on p-value <0.05; significant positive correlations are in red, significant negative correlations are in blue, and insignificant correlations are in gray.

|             |            |            |            |            |            |             |             |             |             |            |           |  |  |
|-------------|------------|------------|------------|------------|------------|-------------|-------------|-------------|-------------|------------|-----------|--|--|
| <b>AdV</b>  |            |            |            |            |            |             |             |             |             |            |           |  |  |
| <b>CoV</b>  | 0.5551     |            |            |            |            |             |             |             |             |            |           |  |  |
| <b>IAV</b>  | 0.9835     | <0.001     |            |            |            |             |             |             |             |            |           |  |  |
| <b>IBV</b>  | 0.9193     | <0.001     | 0.0002     |            |            |             |             |             |             |            |           |  |  |
| <b>MPV</b>  | 0.7528     | <0.001     | 0.0036     | 0.0084     |            |             |             |             |             |            |           |  |  |
| <b>PIV1</b> | 0.7918     | 0.0127     | 0.0213     | 0.0124     | 0.0331     |             |             |             |             |            |           |  |  |
| <b>PIV2</b> | 0.0652     | 0.6249     | 0.3885     | 0.7280     | 0.8087     | <0.001      |             |             |             |            |           |  |  |
| <b>PIV3</b> | 0.0020     | 0.6618     | 0.8066     | 0.2897     | 0.0290     | 0.0589      | 0.0007      |             |             |            |           |  |  |
| <b>PIV4</b> | 0.0452     | 0.0464     | 0.0860     | 0.0544     | 0.0119     | 0.1322      | 0.2000      | 0.0629      |             |            |           |  |  |
| <b>RSV</b>  | 0.0744     | <0.001     | <0.001     | 0.0042     | 0.0003     | 0.5806      | 0.0862      | 0.0039      | 0.9483      |            |           |  |  |
| <b>RV</b>   | 0.0002     | <0.001     | <0.001     | 0.0073     | 0.3200     | 0.6349      | 0.7614      | 0.7352      | 0.1694      | 0.0611     |           |  |  |
|             | <b>AdV</b> | <b>CoV</b> | <b>IAV</b> | <b>IBV</b> | <b>MPV</b> | <b>PIV1</b> | <b>PIV2</b> | <b>PIV3</b> | <b>PIV4</b> | <b>RSV</b> | <b>RV</b> |  |  |

**Table S3:** Correlation coefficients estimated multivariately using Bayesian hierarchical modelling, adjusting for fluctuations in testing frequency, autocorrelation and covariates (age, gender and general practice vs. hospital sample origin). Red indicates significant positive coefficients, blue indicates significant negative coefficients, and gray indicates coefficients not meeting the criteria of significance. Significance was indicated by a p-value <0.05 following a correction for multiple comparisons (see (1) for details) and a higher posterior density (HPD) estimate that excludes zero (see Table S5 below). Significant pairs are indicative of viral interactions and are presented in color in Fig.3 of the main text.

|      |       |       |       |       |       |       |       |      |       |      |    |  |
|------|-------|-------|-------|-------|-------|-------|-------|------|-------|------|----|--|
| AdV  |       |       |       |       |       |       |       |      |       |      |    |  |
| CoV  | 0.11  |       |       |       |       |       |       |      |       |      |    |  |
| IAV  | 0.2   | -0.06 |       |       |       |       |       |      |       |      |    |  |
| IBV  | -0.48 | 0.15  | -0.23 |       |       |       |       |      |       |      |    |  |
| MPV  | -0.11 | -0.48 | -0.21 | -0.39 |       |       |       |      |       |      |    |  |
| PIV1 | 0.22  | -0.27 | 0.24  | -0.31 | 0.19  |       |       |      |       |      |    |  |
| PIV2 | 0.16  | -0.11 | -0.01 | -0.32 | 0     | 0.5   |       |      |       |      |    |  |
| PIV3 | 0.14  | -0.22 | -0.04 | 0.14  | 0.23  | -0.03 | -0.31 |      |       |      |    |  |
| PIV4 | 0.05  | -0.22 | 0.1   | 0.22  | 0.15  | 0.16  | -0.05 | 0.11 |       |      |    |  |
| RSV  | -0.09 | -0.01 | -0.13 | -0.21 | 0.57  | 0.01  | 0.05  | 0.27 | 0.03  |      |    |  |
| RV   | -0.02 | -0.08 | -0.38 | -0.22 | -0.06 | 0.09  | 0.12  | 0.06 | -0.16 | 0.15 |    |  |
|      | AdV   | CoV   | IAV   | IBV   | MPV   | PIV1  | PIV2  | PIV3 | PIV4  | RSV  | RV |  |

**Table S4.** Bayesian hierarchical model higher posterior density (HPD) estimates indicating the significance of correlation coefficient point estimates. Red indicates significant positive coefficients, blue indicates significant negative coefficients, and gray indicates coefficients not meeting the criteria of significance.

|      |                |                |                |                |               |               |               |               |               |               |    |  |
|------|----------------|----------------|----------------|----------------|---------------|---------------|---------------|---------------|---------------|---------------|----|--|
| AdV  |                |                |                |                |               |               |               |               |               |               |    |  |
| CoV  | (-0.26, 0.47)  |                |                |                |               |               |               |               |               |               |    |  |
| IAV  | (-0.11, 0.53)  | (-0.3, 0.23)   |                |                |               |               |               |               |               |               |    |  |
| IBV  | (-0.68, -0.21) | (-0.14, 0.42)  | (-0.45, -0.01) |                |               |               |               |               |               |               |    |  |
| MPV  | (-0.38, 0.17)  | (-0.69, -0.18) | (0, 0.42)      | (-0.61, -0.14) |               |               |               |               |               |               |    |  |
| PIV1 | (-0.11, 0.52)  | (-0.56, 0.05)  | (-0.02, 0.48)  | (-0.59, 0.02)  | (-0.05, 0.43) |               |               |               |               |               |    |  |
| PIV2 | (-0.27, 0.52)  | (-0.45, 0.28)  | (-0.41, 0.37)  | (-0.68, 0)     | (-0.34, 0.28) | (0.21, 0.73)  |               |               |               |               |    |  |
| PIV3 | (-0.27, 0.47)  | (-0.54, 0.11)  | (-0.35, 0.26)  | (-0.13, 0.43)  | (-0.03, 0.46) | (-0.38, 0.32) | (-0.65, 0.13) |               |               |               |    |  |
| PIV4 | (-0.4, 0.46)   | (-0.56, 0.24)  | (-0.22, 0.52)  | (-0.1, 0.57)   | (-0.1, 0.41)  | (-0.27, 0.54) | (-0.6, 0.43)  | (-0.26, 0.45) |               |               |    |  |
| RSV  | (-0.41, 0.26)  | (-0.29, 0.28)  | (-0.37, 0.14)  | (-0.46, 0.05)  | (0.37, 0.7)   | (-0.31, 0.39) | (-0.37, 0.4)  | (-0.06, 0.57) | (-0.35, 0.47) |               |    |  |
| RV   | (-0.38, 0.31)  | (-0.4, 0.22)   | (-0.61, -0.13) | (-0.5, 0.07)   | (-0.29, 0.16) | (-0.21, 0.41) | (-0.36, 0.49) | (-0.3, 0.37)  | (-0.53, 0.27) | (-0.12, 0.42) |    |  |
|      | AdV            | CoV            | IAV            | IBV            | MPV           | PIV1          | PIV2          | PIV3          | PIV4          | RSV           | RV |  |

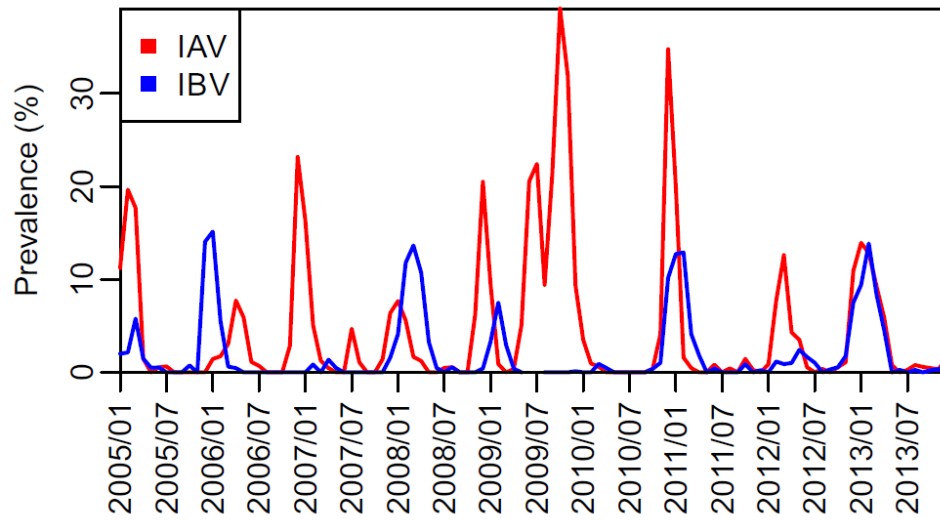

**Fig. S1: Monthly infection prevalence of influenza A (IAV) and influenza B (IBV) viruses among the patient population from 2005 to 2013. IAV and IBV exhibit inconsistent patterns of co-circulation: synchrony, a lag in peak timing, and dominance of one species, are all observed over the nine-year time frame of the study.**

**Table S5:** Distribution of explanatory factors among 6,884\* respiratory virus positive patients tested for 11 virus groups in the Greater Glasgow & Clyde Health Board, 2005-2013.

| Explanatory variable          | Levels                   | No. of patients (%) |
|-------------------------------|--------------------------|---------------------|
| Age group (years)             | 1-5 (reference)          | 1639 (23.8)         |
|                               | <1                       | 1205 (17.5)         |
|                               | 6-16                     | 703 (10.2)          |
|                               | 17-45                    | 1419 (20.6)         |
|                               | 46-64                    | 1094 (15.9)         |
|                               | ≥65                      | 824 (12.0)          |
| Sex                           | Female (reference)       | 3310 (48.1)         |
|                               | Male                     | 3574 (51.9)         |
| Illness severity <sup>‡</sup> | GP (reference)           | 1734 (25.2)         |
|                               | Hospital                 | 4606 (66.9)         |
|                               | Intensive care           | 544 (7.9)           |
| Pandemic period <sup>‡</sup>  | Pre-pandemic (reference) | 2175 (31.6)         |
|                               | Pandemic                 | 1247 (18.1)         |
|                               | Post-pandemic            | 3462 (50.3)         |
| IAV infection                 | No (reference)           | 6078 (88.3)         |
|                               | Yes                      | 806 (11.7)          |
| IBV infection                 | No (reference)           | 6314 (91.7)         |
|                               | Yes                      | 570 (8.3)           |
| RV infection                  | No (reference)           | 4211 (61.2)         |
|                               | Yes                      | 2673 (38.8)         |
| RSV infection                 | No (reference)           | 5972 (86.8)         |
|                               | Yes                      | 912 (13.2)          |
| CoV infection                 | No (reference)           | 6089 (88.5)         |
|                               | Yes                      | 795 (11.5)          |
| AdV infection                 | No (reference)           | 6219 (90.3)         |
|                               | Yes                      | 665 (9.7)           |
| MPV infection                 | No (reference)           | 6351 (92.3)         |
|                               | Yes                      | 533 (7.7)           |
| PIVA infection                | No (reference)           | 6390 (92.8)         |
|                               | Yes                      | 494 (7.2)           |
| PIVB infection                | No (reference)           | 6697 (97.3)         |
|                               | Yes                      | 187 (2.7)           |

\*First observed episodes of respiratory illness were analyzed for patients with multiple episodes during the nine-year study period. <sup>‡</sup>Illness severity was informed by the type of healthcare service attended by the patient upon the collection of the first clinical specimen during a given episode of respiratory illness: General practitioner's surgery (GP), hospital (inpatients and outpatients), or intensive care unit (ICU; including also intensive therapy, high dependency, and coronary care units). <sup>‡</sup> Time with respect to the major circulation of the influenza A(H1N1)pdm09 virus in the UK: pre-pandemic, January 2005 - April 2009; pandemic, May 2009 - January 2011, Post-pandemic: February 2011 - December 2013.

**Tables S6-S14:** Binary logistic regression analysis. Negative and positive virus-virus interactions are highlighted in blue and red respectively. CI=confidence interval. \*GP: general practice; Hospital: inpatients and outpatients; Intensive care: patients admitted to intensive care, intensive therapy, high-dependency, or coronary care units. †Pre-pandemic: January 2005 to April 2009; pandemic (major circulation influenza A(H1N1)pdm09 virus in the UK): May 2009 to February 2011; post-pandemic: March 2011 to December 2013; §Infection and testing frequencies adjusting for response virus seasonality; IAV=influenza A virus [H1N1 and H3N2]; IBV=influenza B virus; RV=human rhinoviruses; CoV=human coronaviruses; MPV=human metapneumovirus; RSV=human respiratory syncytial virus [orthopneumovirus]; AdV=human adenoviruses [mastadenoviruses A-G]; PIVA= human respiroviruses [PIV1 and PIV3]; PIVB= human rubulaviruses [PIV2 and PIV4].

**Table S6:** Results of logistic regression modelling investigating virus interactions with IAV. Based on N=6,153 patients. Area under ROC curve = 78.64% (95% CI: 73.24% - 84.05%).

| Explanatory variable            | Levels                   | Odds ratio | 95% CI    | p-value |
|---------------------------------|--------------------------|------------|-----------|---------|
| Age group (years)               | 1-5 (reference)          | -          | -         | -       |
|                                 | <1                       | 0.52       | 0.23-1.09 | 0.094   |
|                                 | 6-16                     | 0.41       | 0.12-1.11 | 0.113   |
|                                 | 17-45                    | 0.95       | 0.46-1.89 | 0.878   |
|                                 | 46-64                    | 0.8        | 0.36-1.68 | 0.566   |
|                                 | ≥65                      | 0.94       | 0.4-2.07  | 0.889   |
| Sex                             | Female                   | -          | -         | -       |
|                                 | Male                     | 1.66       | 1.03-2.74 | 0.042   |
| Illness severity*               | GP (reference)           | -          | -         | -       |
|                                 | Hospital                 | 0.8        | 0.46-1.43 | 0.435   |
|                                 | Intensive care           | 0.82       | 0.26-2.1  | 0.697   |
| Pandemic period†                | Pre-pandemic (reference) | -          | -         | -       |
|                                 | Pandemic                 | 0.73       | 0.3-1.62  | 0.456   |
|                                 | Post-pandemic            | 0.69       | 0.34-1.39 | 0.296   |
| IAV infection freq <sup>§</sup> | -                        | 3.33       | 2.37-4.76 | <0.001  |
| IAV testing freq <sup>§</sup>   | -                        | 0.8        | 0.41-1.63 | 0.528   |
| IBV infection                   | No (reference)           | -          | -         | -       |
|                                 | Yes                      | 1.02       | 0.36-2.57 | 0.969   |
| RV infection                    | No (reference)           | -          | -         | -       |
|                                 | Yes                      | 0.43       | 0.17-0.94 | 0.048   |
| CoV infection                   | No (reference)           | -          | -         | -       |
|                                 | Yes                      | 0.97       | 0.4-2.09  | 0.938   |
| MPV infection                   | No (reference)           | -          | -         | -       |
|                                 | Yes                      | 0.65       | 0.21-1.65 | 0.408   |
| RSV infection                   | No (reference)           | -          | -         | -       |
|                                 | Yes                      | 1.21       | 0.5-2.63  | 0.649   |
| AdV infection                   | No (reference)           | -          | -         | -       |
|                                 | Yes                      | 2.08       | 0.89-4.39 | 0.069   |
| PIVA infection                  | No (reference)           | -          | -         | -       |
|                                 | Yes                      | 0.6        | 0.13-1.83 | 0.427   |
| PIVB infection                  | No (reference)           | -          | -         | -       |
|                                 | Yes                      | 0.91       | 0.14-3.35 | 0.903   |

**Table S7:** Results of logistic regression modelling investigating virus interactions with IBV. Based on N=6,362 patients. Area under ROC curve = 81.98% (95% CI: 75.51% - 88.46%).

| Explanatory variable            | Levels                   | Odds ratio | 95% CI    | p-value |
|---------------------------------|--------------------------|------------|-----------|---------|
| Age group (years)               | 1-5 (reference)          | -          | -         | -       |
|                                 | <1                       | 0.37       | 0.09-1.17 | 0.126   |
|                                 | 6-16                     | 1.75       | 0.72-4.1  | 0.202   |
|                                 | 17-45                    | 0.37       | 0.13-0.95 | 0.045   |
|                                 | 46-64                    | 0.67       | 0.27-1.62 | 0.385   |
|                                 | ≥65                      | 0.52       | 0.16-1.45 | 0.237   |
| Sex                             | Female                   | -          | -         | -       |
|                                 | Male                     | 0.79       | 0.43-1.41 | 0.418   |
| Illness severity*               | GP (reference)           | -          | -         | -       |
|                                 | Hospital                 | 0.37       | 0.19-0.7  | 0.002   |
|                                 | Intensive care           | 0.8        | 0.26-2.09 | 0.675   |
| Pandemic period <sup>‡</sup>    | Pre-pandemic (reference) | -          | -         | -       |
|                                 | Pandemic                 | 0.96       | 0.31-2.96 | 0.945   |
|                                 | Post-pandemic            | 1.1        | 0.4-3.22  | 0.858   |
| IBV infection freq <sup>§</sup> | -                        | 3.09       | 1.87-5.31 | <0.001  |
| IBV testing freq <sup>§</sup>   | -                        | 1.11       | 0.45-2.92 | 0.824   |
| IAV infection                   | No (reference)           | -          | -         | -       |
|                                 | Yes                      | 0.84       | 0.21-2.65 | 0.784   |
| RV infection                    | No (reference)           | -          | -         | -       |
|                                 | Yes                      | 0.65       | 0.18-1.79 | 0.45    |
| CoV infection                   | No (reference)           | -          | -         | -       |
|                                 | Yes                      | 1.31       | 0.35-3.81 | 0.649   |
| MPV infection                   | No (reference)           | -          | -         | -       |
|                                 | Yes                      | 0.95       | 0.2-3.16  | 0.937   |
| RSV infection                   | No (reference)           | -          | -         | -       |
|                                 | Yes                      | 0.23       | 0.03-0.94 | 0.078   |
| AdV infection                   | No (reference)           | -          | -         | -       |
|                                 | Yes                      | 1.68       | 0.46-4.69 | 0.368   |
| PIVA infection                  | No (reference)           | -          | -         | -       |
|                                 | Yes                      | 1.08       | 0.23-3.78 | 0.912   |
| PIVB infection                  | No (reference)           | -          | -         | -       |
|                                 | Yes                      | 2.01       | 0.35-7.68 | 0.364   |



**Table S8:** Results of logistic regression modelling investigating virus interactions with RV. Based on N=4,629 patients. Area under ROC curve = 78.81% (95% CI: 76.66% - 80.96%).

| Explanatory variable           | Levels                   | Odds ratio | 95% CI    | p-value |
|--------------------------------|--------------------------|------------|-----------|---------|
| Age group (years)              | 1-5 (reference)          | -          | -         | -       |
|                                | <1                       | 1.78       | 1.39-2.3  | <0.001  |
|                                | 6-16                     | 0.45       | 0.27-0.71 | 0.001   |
|                                | 17-45                    | 0.35       | 0.23-0.53 | <0.001  |
|                                | 46-64                    | 0.31       | 0.19-0.48 | <0.001  |
|                                | ≥65                      | 0.3        | 0.18-0.48 | <0.001  |
| Sex                            | Female                   | -          | -         | -       |
|                                | Male                     | 1.04       | 0.84-1.28 | 0.747   |
| Illness severity*              | GP (reference)           | -          | -         | -       |
|                                | Hospital                 | 2.19       | 1.58-3.09 | <0.001  |
|                                | Intensive care           | 1.25       | 0.73-2.09 | 0.411   |
| Pandemic period <sup>‡</sup>   | Pre-pandemic (reference) | -          | -         | -       |
|                                | Pandemic                 | 1.51       | 1.08-2.11 | 0.016   |
|                                | Post-pandemic            | 1.7        | 1.29-2.25 | <0.001  |
| RV infection freq <sup>§</sup> | -                        | 1.49       | 1.19-1.88 | 0.001   |
| RV testing freq <sup>§</sup>   | -                        | 0.71       | 0.58-0.86 | <0.001  |
| IAV infection                  | No (reference)           | -          | -         | -       |
|                                | Yes                      | 0.27       | 0.14-0.51 | <0.001  |
| IBV infection                  | No (reference)           | -          | -         | -       |
|                                | Yes                      | 0.41       | 0.2-0.78  | 0.01    |
| CoV infection                  | No (reference)           | -          | -         | -       |
|                                | Yes                      | 1.16       | 0.77-1.71 | 0.478   |
| MPV infection                  | No (reference)           | -          | -         | -       |
|                                | Yes                      | 1.01       | 0.64-1.56 | 0.974   |
| RSV infection                  | No (reference)           | -          | -         | -       |
|                                | Yes                      | 1.16       | 0.78-1.7  | 0.462   |
| AdV infection                  | No (reference)           | -          | -         | -       |
|                                | Yes                      | 1.6        | 1.09-2.31 | 0.014   |
| PIVA infection                 | No (reference)           | -          | -         | -       |
|                                | Yes                      | 0.88       | 0.56-1.34 | 0.567   |
| PIVB infection                 | No (reference)           | -          | -         | -       |
|                                | Yes                      | 1.27       | 0.73-2.12 | 0.383   |

**Table S9:** Results of logistic regression modelling investigating virus interactions with CoV. Based on N=6,274 patients. Area under ROC curve = 75.16% (95% CI: 71.71 - 78.61%).

| Explanatory variable            | Levels                   | Odds ratio | 95% CI    | p-value |
|---------------------------------|--------------------------|------------|-----------|---------|
| Age group (years)               | 1-5 (reference)          | -          | -         | -       |
|                                 | <1                       | 1.44       | 0.98-2.13 | 0.064   |
|                                 | 6-16                     | 0.58       | 0.28-1.1  | 0.113   |
|                                 | 17-45                    | 0.68       | 0.4-1.14  | 0.155   |
|                                 | 46-64                    | 0.84       | 0.49-1.39 | 0.5     |
|                                 | ≥65                      | 0.74       | 0.38-1.33 | 0.329   |
| Sex                             | Female                   | -          | -         | -       |
|                                 | Male                     | 1.37       | 1.01-1.86 | 0.047   |
| Illness severity*               | GP (reference)           | -          | -         | -       |
|                                 | Hospital                 | 1.01       | 0.69-1.51 | 0.947   |
|                                 | Intensive care           | 0.91       | 0.46-1.7  | 0.775   |
| Pandemic period <sup>‡</sup>    | Pre-pandemic (reference) | -          | -         | -       |
|                                 | Pandemic                 | 0.99       | 0.67-1.45 | 0.944   |
|                                 | Post-pandemic            | 0.45       | 0.28-0.72 | 0.001   |
| CoV infection freq <sup>§</sup> | -                        | 2.13       | 1.62-2.81 | <0.001  |
| CoV testing freq <sup>§</sup>   | -                        | 1.19       | 0.77-1.85 | 0.448   |
| IAV infection                   | No (reference)           | -          | -         | -       |
|                                 | Yes                      | 0.6        | 0.29-1.15 | 0.139   |
| IBV infection                   | No (reference)           | -          | -         | -       |
|                                 | Yes                      | 0.72       | 0.32-1.51 | 0.413   |
| RV infection                    | No (reference)           | -          | -         | -       |
|                                 | Yes                      | 1.21       | 0.77-1.88 | 0.396   |
| MPV infection                   | No (reference)           | -          | -         | -       |
|                                 | Yes                      | 1.03       | 0.51-1.92 | 0.933   |
| RSV infection                   | No (reference)           | -          | -         | -       |
|                                 | Yes                      | 1.69       | 1.03-2.68 | 0.032   |
| AdV infection                   | No (reference)           | -          | -         | -       |
|                                 | Yes                      | 1.92       | 1.16-3.07 | 0.008   |
| PIVA infection                  | No (reference)           | -          | -         | -       |
|                                 | Yes                      | 2.09       | 1.14-3.67 | 0.013   |
| PIVB infection                  | No (reference)           | -          | -         | -       |
|                                 | Yes                      | 0.67       | 0.16-1.87 | 0.505   |

**Table S10:** Results of logistic regression modelling investigating virus interactions with MPV. Based on N=6,452 patient. Area under ROC curve = 72.49% (95% CI: 67.75% - 77.22%).

| Explanatory variable            | Levels                   | Odds ratio | 95% CI    | p-value |
|---------------------------------|--------------------------|------------|-----------|---------|
| Age group (years)               | 1-5 (reference)          | -          | -         | -       |
|                                 | <1                       | 0.87       | 0.52-1.44 | 0.596   |
|                                 | 6-16                     | 0.46       | 0.18-0.99 | 0.066   |
|                                 | 17-45                    | 0.22       | 0.08-0.5  | 0.001   |
|                                 | 46-64                    | 0.46       | 0.21-0.93 | 0.038   |
|                                 | ≥65                      | 0.72       | 0.35-1.38 | 0.337   |
| Sex                             | Female                   | -          | -         | -       |
|                                 | Male                     | 0.95       | 0.64-1.42 | 0.807   |
| Illness severity*               | GP (reference)           | -          | -         | -       |
|                                 | Hospital                 | 1.45       | 0.81-2.8  | 0.241   |
|                                 | Intensive care           | 1.42       | 0.55-3.46 | 0.454   |
| Pandemic period <sup>‡</sup>    | Pre-pandemic (reference) | -          | -         | -       |
|                                 | Pandemic                 | 0.65       | 0.33-1.24 | 0.21    |
|                                 | Post-pandemic            | 0.62       | 0.37-1.04 | 0.068   |
| MPV infection freq <sup>§</sup> | -                        | 2.07       | 1.45-2.96 | <0.001  |
| MPV testing freq <sup>§</sup>   | -                        | 1          | 0.66-1.55 | 0.987   |
| IAV infection                   | No (reference)           | -          | -         | -       |
|                                 | Yes                      | 0.4        | 0.13-1.03 | 0.077   |
| IBV infection                   | No (reference)           | -          | -         | -       |
|                                 | Yes                      | 0.5        | 0.13-1.45 | 0.242   |
| RV infection                    | No (reference)           | -          | -         | -       |
|                                 | Yes                      | 1.12       | 0.59-2.04 | 0.709   |
| CoV infection                   | No (reference)           | -          | -         | -       |
|                                 | Yes                      | 1.03       | 0.47-2.06 | 0.944   |
| RSV infection                   | No (reference)           | -          | -         | -       |
|                                 | Yes                      | 0.62       | 0.27-1.26 | 0.214   |
| AdV infection                   | No (reference)           | -          | -         | -       |
|                                 | Yes                      | 1.63       | 0.84-2.97 | 0.13    |
| PIVA infection                  | No (reference)           | -          | -         | -       |
|                                 | Yes                      | 0.76       | 0.28-1.72 | 0.539   |
| PIVB infection                  | No (reference)           | -          | -         | -       |
|                                 | Yes                      | 1.4        | 0.4-3.75  | 0.548   |

**Table S11:** Results of logistic regression modelling investigating virus interactions with RSV. Based on N=6,198 patients. Area under ROC curve = 81.15% (95% CI: 78.34% - 83.96%).

| Explanatory variable            | Levels                   | Odds ratio | 95% CI    | p-value |
|---------------------------------|--------------------------|------------|-----------|---------|
| Age group (years)               | 1-5 (reference)          | -          | -         | -       |
|                                 | <1                       | 1.67       | 1.21-2.33 | 0.002   |
|                                 | 6-16                     | 0.24       | 0.11-0.48 | <0.001  |
|                                 | 17-45                    | 0.21       | 0.11-0.36 | <0.001  |
|                                 | 46-64                    | 0.3        | 0.17-0.51 | <0.001  |
|                                 | ≥65                      | 0.3        | 0.16-0.52 | <0.001  |
| Sex                             | Male                     | -          | -         | -       |
|                                 | Female                   | 0.91       | 0.69-1.2  | 0.499   |
| Illness severity*               | GP (reference)           | -          | -         | -       |
|                                 | Hospital                 | 1.43       | 0.96-2.19 | 0.089   |
|                                 | Intensive care           | 1.69       | 0.94-3.02 | 0.077   |
| Pandemic period <sup>‡</sup>    | Pre-pandemic (reference) | -          | -         | -       |
|                                 | Pandemic                 | 0.95       | 0.64-1.42 | 0.813   |
|                                 | Post-pandemic            | 0.74       | 0.51-1.07 | 0.111   |
| RSV infection freq <sup>§</sup> | -                        | 2.65       | 2.13-3.33 | <0.001  |
| RSV testing freq <sup>§</sup>   | -                        | 1.03       | 0.71-1.49 | 0.868   |
| IAV infection                   | No (reference)           | -          | -         | -       |
|                                 | Yes                      | 0.82       | 0.42-1.54 | 0.546   |
| IBV infection                   | No (reference)           | -          | -         | -       |
|                                 | Yes                      | 0.19       | 0.03-0.64 | 0.025   |
| RV infection                    | No (reference)           | -          | -         | -       |
|                                 | Yes                      | 1.65       | 1.06-2.54 | 0.025   |
| CoV infection                   | No (reference)           | -          | -         | -       |
|                                 | Yes                      | 1.86       | 1.16-2.91 | 0.008   |
| MPV infection                   | No (reference)           | -          | -         | -       |
|                                 | Yes                      | 0.73       | 0.36-1.38 | 0.358   |
| AdV infection                   | No (reference)           | -          | -         | -       |
|                                 | Yes                      | 1.21       | 0.75-1.9  | 0.417   |
| PIVA infection                  | No (reference)           | -          | -         | -       |
|                                 | Yes                      | 1.58       | 0.87-2.75 | 0.118   |
| PIVB infection                  | No (reference)           | -          | -         | -       |
|                                 | Yes                      | 1.07       | 0.45-2.26 | 0.867   |

**Table S12:** Results of logistic regression modelling investigating virus interactions with AdV. Based on N=6,449 patients. Area under ROC curve = 79.58% (95% CI: 76.82% - 82.33%).

| Explanatory variable            | Levels                   | Odds ratio | 95% CI    | p-value |
|---------------------------------|--------------------------|------------|-----------|---------|
| Age group (years)               | 1-5 (reference)          | -          | -         | -       |
|                                 | <1                       | 0.94       | 0.69-1.27 | 0.697   |
|                                 | 6-16                     | 0.21       | 0.1-0.39  | <0.001  |
|                                 | 17-45                    | 0.12       | 0.06-0.21 | <0.001  |
|                                 | 46-64                    | 0.16       | 0.09-0.29 | <0.001  |
|                                 | ≥65                      | 0.05       | 0.01-0.14 | <0.001  |
| Sex                             | Female                   | -          | -         | -       |
|                                 | Male                     | 1.05       | 0.8-1.39  | 0.717   |
| Illness severity*               | GP (reference)           | -          | -         | -       |
|                                 | Hospital                 | 1.67       | 1.09-2.65 | 0.024   |
|                                 | Intensive care           | 1.03       | 0.5-2.04  | 0.934   |
| Pandemic period <sup>‡</sup>    | Pre-pandemic (reference) | -          | -         | -       |
|                                 | Pandemic                 | 0.8        | 0.51-1.23 | 0.317   |
|                                 | Post-pandemic            | 0.73       | 0.51-1.06 | 0.098   |
| AdV infection freq <sup>§</sup> | -                        | 1.64       | 1.28-2.11 | <0.001  |
| AdV testing freq <sup>§</sup>   | -                        | 0.86       | 0.64-1.14 | 0.292   |
| IAV infection                   | No (reference)           | -          | -         | -       |
|                                 | Yes                      | 1.19       | 0.61-2.2  | 0.603   |
| IBV infection                   | No (reference)           | -          | -         | -       |
|                                 | Yes                      | 0.8        | 0.31-1.77 | 0.602   |
| RV infection                    | No (reference)           | -          | -         | -       |
|                                 | Yes                      | 1.69       | 1.11-2.53 | 0.012   |
| CoV infection                   | No (reference)           | -          | -         | -       |
|                                 | Yes                      | 1.74       | 1.07-2.75 | 0.021   |
| MPV infection                   | No (reference)           | -          | -         | -       |
|                                 | Yes                      | 1.44       | 0.82-2.44 | 0.189   |
| RSV infection                   | No (reference)           | -          | -         | -       |
|                                 | Yes                      | 0.82       | 0.51-1.3  | 0.422   |
| PIVA infection                  | No (reference)           | -          | -         | -       |
|                                 | Yes                      | 1.66       | 0.97-2.73 | 0.053   |
| PIVB infection                  | No (reference)           | -          | -         | -       |
|                                 | Yes                      | 2.46       | 1.26-4.49 | 0.005   |

**Table S13:** Results of logistic regression modelling investigating virus interactions with PIVA. Based on N=6,495 patients. Area under ROC curve = 75.94% (95% CI: 71.58% - 80.30%).

| Explanatory variable            | Levels                   | Odds ratio | 95% CI    | p-value |
|---------------------------------|--------------------------|------------|-----------|---------|
| Age group (years)               | 1-5 (reference)          | -          | -         | -       |
|                                 | <1                       | 1.06       | 0.67-1.68 | 0.794   |
|                                 | 6-16                     | 0.06       | 0-0.3     | 0.007   |
|                                 | 17-45                    | 0.31       | 0.14-0.64 | 0.003   |
|                                 | 46-64                    | 0.41       | 0.18-0.82 | 0.018   |
|                                 | ≥65                      | 0.35       | 0.13-0.79 | 0.02    |
| Sex                             | Female                   | -          | -         | -       |
|                                 | Male                     | 1.25       | 0.84-1.88 | 0.282   |
| Illness severity*               | GP (reference)           | -          | -         | -       |
|                                 | Hospital                 | 1.23       | 0.69-2.35 | 0.502   |
|                                 | Intensive care           | 0.82       | 0.28-2.1  | 0.686   |
| Pandemic period <sup>‡</sup>    | Pre-pandemic (reference) | -          | -         | -       |
|                                 | Pandemic                 | 0.96       | 0.52-1.73 | 0.895   |
|                                 | Post-pandemic            | 1.09       | 0.65-1.85 | 0.744   |
| AdV infection freq <sup>§</sup> | -                        | 1.68       | 1.18-2.37 | 0.004   |
| AdV testing freq <sup>§</sup>   | -                        | 0.59       | 0.41-0.86 | 0.005   |
| IAV infection                   | No (reference)           | -          | -         | -       |
|                                 | Yes                      | 0.51       | 0.12-1.55 | 0.294   |
| IBV infection                   | No (reference)           | -          | -         | -       |
|                                 | Yes                      | 1.19       | 0.33-3.38 | 0.76    |
| RV infection                    | No (reference)           | -          | -         | -       |
|                                 | Yes                      | 1.3        | 0.74-2.21 | 0.341   |
| CoV infection                   | No (reference)           | -          | -         | -       |
|                                 | Yes                      | 2.39       | 1.25-4.35 | 0.006   |
| MPV infection                   | No (reference)           | -          | -         | -       |
|                                 | Yes                      | 1.04       | 0.4-2.3   | 0.934   |
| RSV infection                   | No (reference)           | -          | -         | -       |
|                                 | Yes                      | 1.42       | 0.73-2.62 | 0.282   |
| AdV infection                   | No (reference)           | -          | -         | -       |
|                                 | Yes                      | 2.15       | 1.19-3.73 | 0.008   |
| PIVB infection                  | No (reference)           | -          | -         | -       |
|                                 | Yes                      | 0.34       | 0.02-1.59 | 0.287   |

**Table S14:** Results of logistic regression modelling investigating virus interactions with PIVB. Based on N=6,743 patients. Area under ROC curve = 80.59% (95% CI: 75.31% - 85.88%).

| Explanatory variable            | Levels                   | Odds ratio | 95% CI     | p-value |
|---------------------------------|--------------------------|------------|------------|---------|
| Age group (years)               | 1-5 (reference)          | -          | -          | -       |
|                                 | <1                       | 0.55       | 0.24-1.15  | 0.123   |
|                                 | 6-16                     | 0.54       | 0.15-1.48  | 0.276   |
|                                 | 17-45                    | 0.45       | 0.15-1.17  | 0.129   |
|                                 | 46-64                    | 0.32       | 0.07-0.95  | 0.068   |
|                                 | ≥65                      | 0.13       | 0.01-0.62  | 0.045   |
| Sex                             | Female                   | -          | -          | -       |
|                                 | Male                     | 0.87       | 0.48-1.59  | 0.654   |
| Illness severity*               | GP (reference)           | -          | -          | -       |
|                                 | Hospital                 | 5.8        | 1.7-36.4   | 0.018   |
|                                 | Intensive care           | 4.58       | 0.73-35.66 | 0.102   |
| Pandemic period <sup>‡</sup>    | Pre-pandemic (reference) | -          | -          | -       |
|                                 | Pandemic                 | 0.94       | 0.35-2.34  | 0.898   |
|                                 | Post-pandemic            | 0.78       | 0.35-1.75  | 0.539   |
| AdV infection freq <sup>§</sup> | -                        | 2.43       | 1.39-4.22  | 0.002   |
| AdV testing freq <sup>§</sup>   | -                        | 0.99       | 0.54-1.85  | 0.987   |
| IAV infection                   | No (reference)           | -          | -          | -       |
|                                 | Yes                      | 0.89       | 0.13-3.62  | 0.891   |
| IBV infection                   | No (reference)           | -          | -          | -       |
|                                 | Yes                      | 2.5        | 0.51-9.07  | 0.199   |
| RV infection                    | No (reference)           | -          | -          | -       |
|                                 | Yes                      | 2.75       | 1.26-5.89  | 0.009   |
| CoV infection                   | No (reference)           | -          | -          | -       |
|                                 | Yes                      | 1.01       | 0.23-3.07  | 0.99    |
| MPV infection                   | No (reference)           | -          | -          | -       |
|                                 | Yes                      | 2.02       | 0.56-5.63  | 0.223   |
| RSV infection                   | No (reference)           | -          | -          | -       |
|                                 | Yes                      | 1.58       | 0.6-3.76   | 0.323   |
| AdV infection                   | No (reference)           | -          | -          | -       |
|                                 | Yes                      | 4          | 1.83-8.26  | <0.001  |
| PIVA infection                  | No (reference)           | -          | -          | -       |
|                                 | Yes                      | 0.45       | 0.02-2.16  | 0.433   |

**Table S15:** Odds ratios estimates from tests of 72 pairwise interactions generated from nine virus logistic regression models

|                |      | Explanatory virus |      |      |      |      |      |      |      |      |
|----------------|------|-------------------|------|------|------|------|------|------|------|------|
|                |      | IAV               | IBV  | RV   | CoV  | MPV  | RSV  | AdV  | PIVA | PIVB |
| Response virus | IAV  |                   | 1.02 | 0.43 | 0.97 | 0.65 | 1.21 | 2.08 | 0.6  | 0.91 |
|                | IBV  | 0.84              |      | 0.65 | 1.31 | 0.95 | 0.23 | 1.68 | 1.08 | 2.01 |
|                | RV   | 0.27              | 0.41 |      | 1.16 | 1.01 | 1.16 | 1.60 | 0.88 | 1.27 |
|                | CoV  | 0.60              | 0.72 | 1.21 |      | 1.03 | 1.69 | 1.92 | 2.09 | 0.67 |
|                | MPV  | 0.40              | 0.50 | 1.12 | 1.03 |      | 0.62 | 1.63 | 0.76 | 1.40 |
|                | RSV  | 0.82              | 0.19 | 1.65 | 1.86 | 0.73 |      | 1.21 | 1.58 | 1.07 |
|                | AdV  | 1.19              | 0.80 | 1.69 | 1.74 | 1.44 | 0.82 |      | 1.66 | 2.46 |
|                | PIVA | 0.51              | 1.19 | 1.30 | 2.39 | 1.04 | 1.42 | 2.15 |      | 0.34 |
|                | PIVB | 0.89              | 2.50 | 2.75 | 1.01 | 2.02 | 1.58 | 4.00 | 0.45 |      |

**Table S16:** Uncorrected p-values of odds ratios estimated from tests of 72 pairwise interactions generated from nine logistic regression models

|                |      | Explanatory virus |       |       |       |       |       |        |       |       |
|----------------|------|-------------------|-------|-------|-------|-------|-------|--------|-------|-------|
|                |      | IAV               | IBV   | RV    | CoV   | MPV   | RSV   | AdV    | PIVA  | PIVB  |
| Response virus | IAV  |                   | 0.969 | 0.048 | 0.938 | 0.408 | 0.649 | 0.069  | 0.427 | 0.903 |
|                | IBV  | 0.784             |       | 0.450 | 0.649 | 0.937 | 0.078 | 0.368  | 0.912 | 0.364 |
|                | RV   | <0.001            | 0.010 |       | 0.478 | 0.974 | 0.462 | 0.014  | 0.567 | 0.383 |
|                | CoV  | 0.139             | 0.413 | 0.396 |       | 0.933 | 0.032 | 0.008  | 0.013 | 0.505 |
|                | MPV  | 0.077             | 0.242 | 0.709 | 0.944 |       | 0.214 | 0.130  | 0.539 | 0.548 |
|                | RSV  | 0.546             | 0.025 | 0.025 | 0.008 | 0.358 |       | 0.417  | 0.118 | 0.867 |
|                | AdV  | 0.603             | 0.602 | 0.012 | 0.021 | 0.189 | 0.422 |        | 0.053 | 0.005 |
|                | PIVA | 0.294             | 0.760 | 0.341 | 0.006 | 0.934 | 0.282 | 0.008  |       | 0.287 |
|                | PIVB | 0.891             | 0.199 | 0.009 | 0.990 | 0.223 | 0.323 | <0.001 | 0.433 |       |

**Table S17:** P-values corrected using Holm's method to account for multiple hypothesis testing

|                |      | Explanatory virus |       |       |       |     |     |        |       |       |
|----------------|------|-------------------|-------|-------|-------|-----|-----|--------|-------|-------|
|                |      | IAV               | IBV   | RV    | CoV   | MPV | RSV | AdV    | PIVA  | PIVB  |
| Response virus | IAV  |                   | 1     | 1     | 1     | 1   | 1   | 1      | 1     | 1     |
|                | IBV  | 1                 |       | 1     | 1     | 1   | 1   | 1      | 1     | 1     |
|                | RV   | <0.001            | 0.640 |       | 1     | 1   | 1   | 0.854  | 1     | 1     |
|                | CoV  | 1                 | 1     | 1     |       | 1   | 1   | 0.544  | 0.806 | 1     |
|                | MPV  | 1                 | 1     | 1     | 1     |     | 1   | 1      | 1     | 1     |
|                | RSV  | 1                 | 1     | 1     | 0.544 | 1   |     | 1      | 1     | 1     |
|                | AdV  | 1                 | 1     | 0.756 | 1     | 1   | 1   |        | 1     | 0.350 |
|                | PIVA | 1                 | 1     | 1     | 0.414 | 1   | 1   | 0.544  |       | 1     |
|                | PIVB | 1                 | 1     | 0.585 | 1     | 1   | 1   | <0.001 | 1     |       |



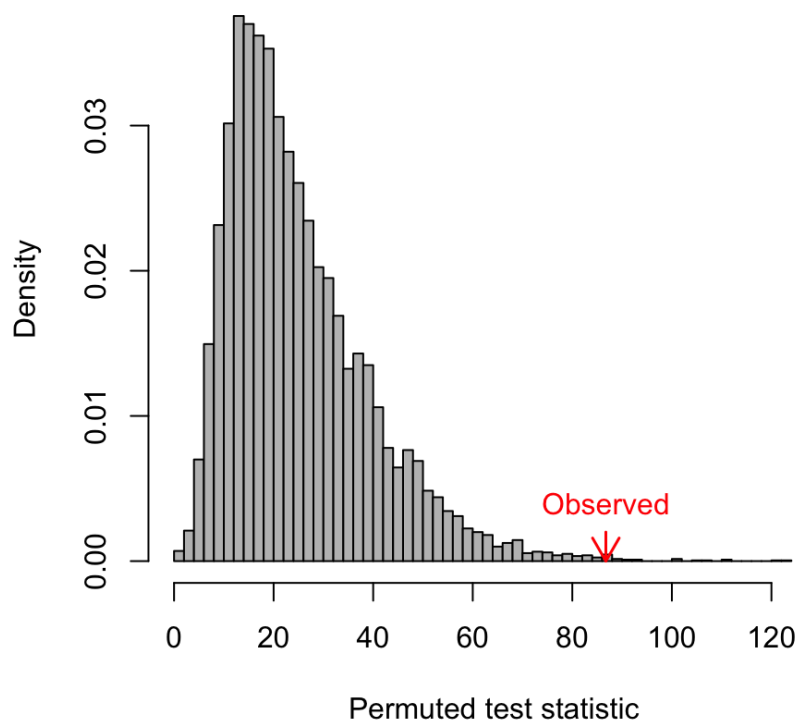

**Fig. S2: Histogram illustrating a global test of pairwise interactions among the five virus groups (IBV, CoV, MPV, RSV, PIVA) where no significant individual pairwise interaction was found. The distribution of the test statistic, calculated using Fisher's method of combining p-values ( $-2 \sum \log(p)$ ), was simulated under the global null hypothesis using 10,000 permutations (grey bars) and compared with the observed test statistic (red arrow), revealing strong evidence ( $p=0.0021$ ) of association among the five virus groups.**

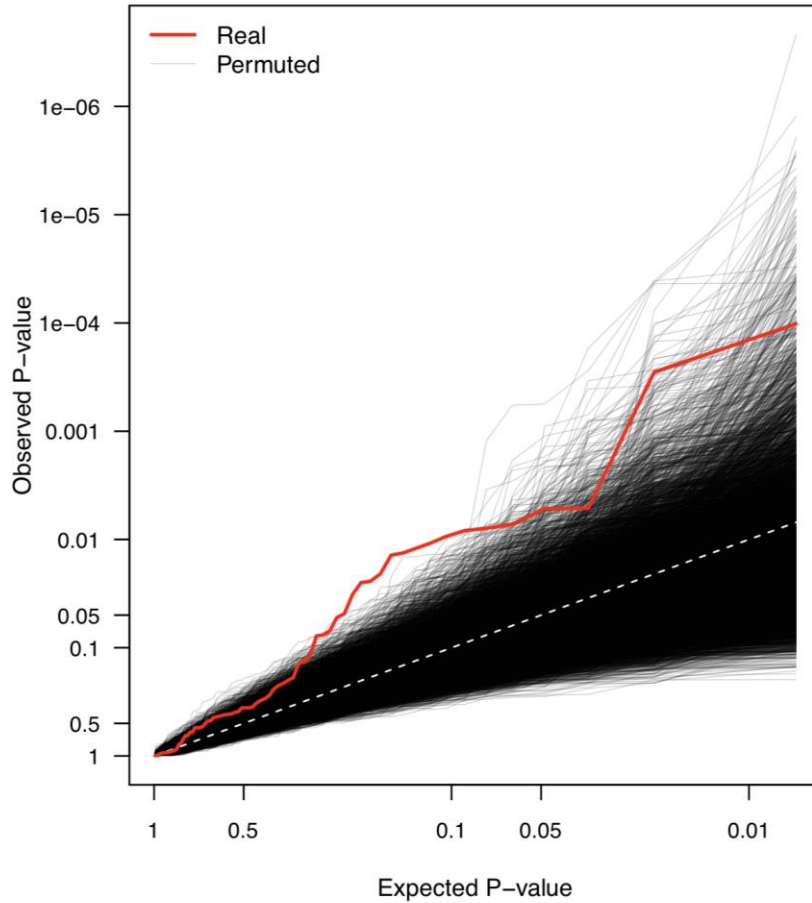

**Fig. S3: Quantile-quantile (QQ) plot of the observed p-value distribution from the 72 pairwise tests among nine groups of respiratory virus (red line), compared with the expected QQ line under the global null hypothesis (white dashed line), and the distribution of QQ lines simulated from the global null hypothesis using 10,000 permutations (thin black lines). The steeper slope of the observed QQ line relative to the great majority of the permuted lines indicates that the observed p-values are lower than expected, providing strong evidence against the global null hypothesis of no association among any of the viruses ( $p = 0.0003$ ; permutation test comparing the observed p-values from the observed data, combined using Fisher's method, to the 10,000 permuted data sets).**

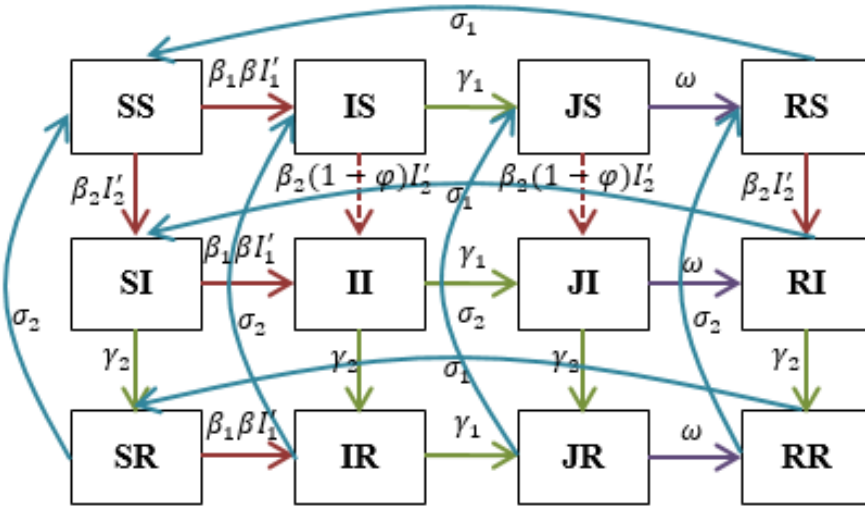

**Fig. S4: Two-pathogen deterministic infection transmission model**

Model class  $\{1,2\}$  denotes the infection status of individuals with respect to a seasonal influenza (virus 1) and a non-seasonal ubiquitous common cold virus (virus 2); subscripts 1 and 2 denote virus specific parameters; S=susceptible; I=infectious refractory phase; J=non-infectious refractory phase, R=immunity phase. See Table S17 for full details of model parameters.

**Table S18: Two-pathogen mechanistic model parameter values and ranges**

| Parameter  | Description                                                          | Value/ranges                     |
|------------|----------------------------------------------------------------------|----------------------------------|
| B          | Rate of virus 1 transmission/person                                  | 1 (days <sup>-1</sup> )          |
| B          | Seasonal amplitude of virus 1 forcing parameter                      | 0.1                              |
| $\varphi$  | Interaction parameter determining level of susceptibility to virus 2 | 0 - 1                            |
| $\beta_1$  | Rate of virus 1 transmission/person                                  | 0.8 (days <sup>-1</sup> )        |
| $\beta_2$  | Rate of virus 2 transmission/person                                  | 1 (days <sup>-1</sup> )          |
| $\gamma_1$ | Rate of transition to non-infectious (i.e. 1/infectious period)      | 0.5 (days <sup>-1</sup> )        |
| $\gamma_2$ | Rate of transition to non-infections (i.e. 1/infectious period)      | 0.5 (days <sup>-1</sup> )        |
| $\omega$   | Rate at which individuals acquire antibodies                         | 0.04 - 1 (days <sup>-1</sup> )   |
| $\sigma_1$ | Rate of waning immunity against virus 1                              | 0.0027 (days <sup>-1</sup> )     |
| $\sigma_2$ | Rate of waning immunity against virus 2                              | 0.0274 (days <sup>-1</sup> )     |
| $\mu$      | Non-disease-induced mortality rate (1/life expectancy)               | 1/(70*365) (days <sup>-1</sup> ) |

**Table S19:** Investigating the sensitivity of patient coinfection prevalence to the time frame window used to define an episode of respiratory illness.

| Episode window (days) | (A) Number of patient episodes of illness | (B) Number of patient episodes tested for all viruses | (C) Number of virus-positive patient episodes tested for all viruses | % coinfectd (among B) | % coinfectd (among C) |
|-----------------------|-------------------------------------------|-------------------------------------------------------|----------------------------------------------------------------------|-----------------------|-----------------------|
| 1                     | 49,844                                    | 31,353                                                | 10,737                                                               | 3.5                   | 10.2                  |
| 10                    | 46,350                                    | 28,851                                                | 10,049                                                               | 3.7                   | 10.6                  |
| 20                    | 45,076                                    | 27,916                                                | 9,812                                                                | 3.8                   | 10.8                  |
| <b>30</b>             | <b>44,230</b>                             | <b>27,284</b>                                         | <b>9,654</b>                                                         | <b>4.0</b>            | <b>11.2</b>           |
| 40                    | 43,690                                    | 26,865                                                | 9,570                                                                | 4.1                   | 11.5                  |
| 50                    | 43,212                                    | 26,508                                                | 9,494                                                                | 4.3                   | 12.0                  |
| 60                    | 42,852                                    | 26,244                                                | 9,428                                                                | 4.5                   | 12.5                  |

\* The episode window used in the analyses is highlighted in bold.

## References

1. Mair C, *et al.* (2019) Estimation of temporal covariances in pathogen dynamics using Bayesian multivariate autoregressive models. In Press. *Plos Computational Biology*.
